## **Title:** Novel autoantibody targets identified in patients with autoimmune hepatitis (AIH) by PhIP-Seq reveals pathogenic insights

Arielle Klepper<sup>1</sup>, Andrew Kung<sup>1,2</sup>, Sara E. Vazquez<sup>1,2</sup>, Anthea Mitchell<sup>1,2</sup>, Sabrina Mann<sup>1,2</sup>, Kelsey Zorn<sup>1</sup>, Isaac Avila-Vargas<sup>1</sup>, Swathi Kari<sup>1</sup>, Melawit Tekeste<sup>1</sup>, Javier Castro<sup>1</sup>, Briton Lee<sup>1</sup>, Maria Duarte<sup>1</sup>, Mandana Khalili<sup>1,4</sup>, Monica Yang<sup>1</sup>, Paul Wolters<sup>1</sup>, Jennifer Price<sup>1,4</sup>, Emily Perito<sup>1,4</sup>, Sandy Feng<sup>1,4</sup>, Jacquelyn J. Maher<sup>1,4</sup>, Jennifer Lai<sup>1,4</sup>, Christina Weiler-Normann<sup>3</sup>, Ansgar W Lohse<sup>3</sup>, Joseph DeRisi<sup>1,2\*</sup>, Michele Tana<sup>1,4\*</sup>

<sup>1</sup>University of California, San Francisco, USA

<sup>2</sup>Chan Zuckerberg Biohub; San Francisco, CA, USA

<sup>3</sup>Medical Department, University Medical Center Hamburg-Eppendorf, Hamburg, DE

<sup>4</sup>UCSF Liver Center

### **Abstract**

Autoimmune hepatitis (AIH) is a severe autoimmune disease, characterized by the presence of autoantibodies. However, the role of autoantibodies in the pathophysiology of AIH remains uncertain. Here, we employed Phage Immunoprecipitation-Sequencing (PhIP-Seq) to identify novel autoantibodies in AIH. Using these results, a logistic regression classifier was able to predict which patients had AIH, indicating the presence of a distinct humoral immune signature. To further investigate the autoantibodies most specific to AIH, significant peptides were identified relative to a broad array of controls (298 patients with non-alcoholic fatty liver disease (NAFLD), primary biliary cholangitis (PBC), or healthy controls). Top ranked autoreactive targets included SLA, the target of a well-recognized autoantibody in AIH, and disco interacting protein 2 homolog A (DIP2A). The autoreactive fragment of DIP2A shares a 9-amino acid stretch nearly identical to the U27 protein of HHV-6B, a virus found in the liver. In addition, antibodies against peptides derived from the leucine rich repeat N-terminal (LRRNT) domain of the relaxin family peptide receptor 1 (RXFP1) were highly enriched and specific to AIH. The enriched peptides map to a motif adjacent to the receptor binding domain, which is required for RXFP1 signaling. RXFP1 is a G protein-coupled receptor that binds relaxin-2, an anti-fibrogenic molecule shown to reduce the myofibroblastic phenotype of hepatic stellate cells. Eight of nine patients with antibodies to RXFP1 had evidence of advanced fibrosis (F3 or greater). Furthermore, serum from AIH patients positive for anti-RXFP1 antibody was able to significantly inhibit relaxin-2 signaling in the human monocytic cell line, THP1. Depletion of IgG from anti-RXFP1 positive serum abrogated this effect. These data provide supporting evidence that HHV6 plays a role in the development of AIH and point to a potential pathogenic role for anti-RXFP1 IgG in some patients. Identification of anti-RXFP1 in patient serum may enable risk stratification of AIH patients for fibrosis progression and lead to the development of novel strategies for disease intervention.

### **Introduction**

Autoimmune hepatitis (AIH) is a chronic, severe liver disease identified in the 1950s, affecting all ages, rising in incidence<sup>1</sup>, and disproportionately impacting people of color<sup>2,3</sup>. Treatment of AIH frequently requires lifelong therapy with immunosuppressive medications, with multiple morbid side effects. Despite the longstanding clinical burden of AIH, little is known about the etiopathogenesis of disease. Clinically, AIH onset is often marked by an episode of acute hepatitis. Initial work-up includes assessment of total IgG levels (commonly elevated in patients with AIH), as well as evaluation for characteristic autoantibodies, particularly anti-nuclear antibodies (ANA), anti-smooth muscle antibodies (SMA), and liver-kidney microsomes type 1 (anti-LKM-1), none of which are specific to AIH or to the liver itself, as well as anti-soluble liver

antigen and liver pancreas (SLA/LP), a liver antigen highly specific to AIH, present in up to 20% of AIH patients<sup>4-6</sup>. Determination of this serologic profile is essential for diagnosis and to discriminating AIH types, AIH-1 (primarily affecting adults), and AIH-2 (primarily affecting children). However, the significance of autoantibodies in determining prognosis, or their role in disease pathogenesis, is debated.

The pathogenesis of AIH is believed to result from a combination of genetic, immunologic, and environmental factors. Regarding genetic predisposition, genome-wide association studies (GWAS) of patients from Europe and North America have shown a significant association between AIH-1 and HLA alleles DRB1\*0301 and DRB1\*0401<sup>7</sup>. Several studies have further implicated a break-down in self-tolerance as a core immunologic mechanism of disease<sup>8,9</sup>. Numerous environmental triggers have also been associated with AIH, such as medications and viruses, for example minocycline, nitrofurantoin, hepatitis viruses, and human herpes viruses<sup>10,11</sup>. However, a driving, central autoantigen in AIH-1 has not been identified, and the proposed contribution of molecular mimicry as a pathogenic mechanism remains controversial.

While autoantibodies play a central role in AIH diagnosis clinically, further analysis of the pathogenic role of B cells and antibodies is needed in order to advance our understanding of AIH, and has been cited as a core goal of the AIH research agenda by professional societies<sup>12</sup>. Phage display immunoprecipitation sequencing (PhIP-Seq) is a platform employed by our group, and others, to perform an unbiased, high-throughput assessment of antibodies across a broad array of autoimmune conditions<sup>13-21</sup>. We applied PhIP-Seq to study serum or plasma from 115 AIH patients obtained from multicenter, international collaborative cohort of patients, and compared these results to a robust series of 298 control serum or plasma samples from patients with non-alcoholic fatty liver disease (NAFLD), primary biliary cholangitis (PBC), or healthy controls to further define novel disease and tissue specific autoantibody targets to better inform our understanding of AIH pathogenesis.

## Results

### **Autoantibody testing was performed on broad, multi-center, international cohorts with robust controls**

As part of a multicenter, international collaboration, specimens of serum or plasma from patients with AIH (n = 115), NAFLD (n = 178), or PBC (n = 26) were contributed by three well-characterized patient cohorts: Prospective Observational Study to Understand Liver Diseases (POSULD, San Francisco General Hospital, SF, CA, USA), FrAILT (UCSF Parnassus Hospital, SF, CA, UCSA), and the Eppendorf University cohort (Hamburg, Germany). De-identified healthy control samples were obtained from two sources: the New York Blood Center or purchased through SeraCare (K2EDTA human plasma). Clinical characteristics are summarized in Table 1 (see methods for additional detail).

### **AIH disease status can be predicted using machine learning**

A schematic overview of PhIP-Seq methodology is summarized in Figure 1a, as well a work-flow for the customized bioinformatic approach to analysis of this data, as previously reported<sup>14</sup> (Fig 1b). Applying these methods, we performed logistic regression with an 85%-15% train-test split ratio with 100 random iterations (Fig 1c). The resulting model was able to predict a diagnosis of AIH (versus healthy controls) on the basis of PhIP-Seq autoreactivity against all peptides (731,724 peptides; median AUC = 0.81). These results were significant, given that serologic diagnosis of AIH is quite heterogenous, and the one commonly identified autoantibody highly specific to AIH

(SLA) is present in up to 20% of AIH patients. Furthermore, patients may present with no positive autoantibodies at the time of clinical assessment<sup>22</sup>. When attempting to limit the logistic regression model to a smaller number of features using only the top 1,000 weighted peptides, predictive power was degraded (median AUC = 0.62), suggesting the presence of substantial heterogeneity in the autoreactivity profiles of individual AIH patients that requires the full breadth of peptides to successfully classify disease state.

### **Identification of individual peptide reactivities identifies novel and previously recognized antibody targets in AIH**

Given the known clinical heterogeneity in AIH, immunoreactivities to individual peptides were examined to identify targets that inform our understanding of AIH pathogenesis. In order to do this, significantly enriched targets were selected by setting a Z-score threshold of >2.5 relative to the mean of healthy control samples, and further requiring that hits could *not* be significantly enriched in more than 2% of *all* controls (NAFLD, PBC, and healthy controls, 6/298 patients) and should be significantly enriched in at least 6% of the AIH patients (7/115 patients). This approach identified 120 hits at the peptide level, representing 110 genes (see Supplemental Table 1 for a complete list). To further refine this list, liver-specific targets were selected based on gene annotations using the ProteINSIDE online tool<sup>23</sup>, which includes data on the tissue expression patterns of 102/110 genes. Annotations were used to divide genes into 3 categories: category 1, genes annotated as highly expressed or enriched in liver tissue (8 peptides corresponding to 6 genes), category 2, genes expressed ubiquitously or at low levels in liver (24 peptides corresponding to 22 genes) and category 3, genes not expressed in liver (80 peptides corresponding to 74 genes).

Among the hits in category 1, genes enriched/highly expressed in liver, SEPSECS, the gene encoding SLA/LP protein, was the most specific, and was not seen in any control patients (Fig 2b). The peptide hits were localized to the C-terminus of the SLA/LP protein, starting at amino acid 393, which corresponds to the region reported to be essential for antibody reactivity to SLA (amino acids 370-410)<sup>6</sup>. The remaining 5 hits in category 1 were all novel putative autoantibody targets. Among these, 3 were chosen for additional analysis because they are directed against secreted proteins or cell surface receptors. Interestingly, deficiency in each of these 3 proteins, CFHR1, ADAMTS-7 and RXFP1, has been previously associated with inflammatory disease/autoimmunity or liver-related fibrosis. The complement Factor H Related 1 protein (CFHR1) has been associated with autoimmunity, specifically with the development of atypical hemolytic uremic syndrome<sup>24</sup>. The ADAMTS (a disintegrin-like and metalloproteinase with thrombospondin motif) family member – ADAMTS-7, is a multi-domain secreted metalloproteinase that degrades cartilage oligomeric matrix protein (COMP) and is part of a positive feedback loop with TNF- $\alpha$ <sup>25</sup>, whose deficiency has been reported to cause biliary fibrosis<sup>26</sup>. Of particular interest to AIH pathogenesis was relaxin family peptide receptor 1 (RXFP1), which is a cell surface receptor for the anti-fibrotic molecule, relaxin-2. Relaxin-2 signaling through RXFP1 on the surface of activated hepatic stellate cells has been shown to decrease their fibrogenic potential<sup>27</sup>, and relaxin-2 has been used as an anti-fibrotic agent in clinical trials of patients with alcohol-associated liver disease<sup>28</sup>. Autoantibody-mediated blockade of RXFP1 signaling, which is anti-fibrotic, has the potential to promote fibrogenesis. Among the 9 AIH patients positive for antibodies against RXFP1 by PhIP-Seq, 8 patients (88%) had evidence of advanced fibrosis, F3 or greater. Therefore, RXFP1 was selected as a candidate for further validation and investigation.

### **Examination of reactivities to putative autoantigens not found in liver identifies potential epitope homology to HHV6 U27 protein**

Regarding the genes in category 3, those annotated as not being expressed in liver, the top 20 peptides are displayed in Fig 2c. Three peptides all derive from the same gene, DIP2A. These peptides all overlapped, sharing a 19 amino acid epitope common to each peptide. DIP2A is not known to be expressed in the liver, suggesting that the enrichment of these peptides was due to antibodies directed against some other similar target, perhaps of viral origin. To explore this hypothesis, a protein-level BLAST search against bacterial and viral taxa was performed using the enriched peptides as bait. Of the viruses that infect humans, the top match to the DIP2A 19 amino acid common epitope was the U27 protein of human herpes virus 6B (HHV-6B) (Fig 3d). U27 is a viral protein required for replication processivity, which is key to the HHV-6 viral lifecycle. Of note, the SLA protein has also been previously reported to have 41% homology to a peptide derived from the HHV-6 U14 protein<sup>29</sup>; however, applying the same BLAST search methods to identify viral homology to the previously reported antigenic region of the SLA/LP epitope (amino acids 371-409) did not identify HHV-6 as a potential match. These differences may be accounted for by the high degree of similarity between DIP2A and HHV-6 U27: 7 of the 9 amino acids were identical, an 8<sup>th</sup> shared similar chemical properties, and only 1 was mismatched (Fig 3d). While HHV6 is nearly ubiquitous, the virus itself establishes latency, re-activation has been associated with hepatitis<sup>30</sup>, and there are links between HHV-6 infection and the onset of AIH<sup>31</sup>. Using the MHC Class II search feature of the immune epitope database (IEDB)<sup>32</sup>, the 9-amino acid region of U27 with homology to DIP2A is also predicted to bind with high affinity to HLA-DRB1 03\*01, one of the two risk alleles associated with AIH in genome-wide association studies of patients across Europe and North America<sup>7</sup>. This is consistent with the notion that molecular mimicry to HHV-6, perhaps modulated by HLA type, could play a role in the development of autoimmune hepatitis.

### **Orthogonal validation of RXFP1 peptide reactivity by split luciferase binding assay confirms PhIP-Seq results, and correlation with patient metadata reveals clinical relevance**

To validate the RXFP1 finding, we employed a split luciferase binding assay (SLBA), as recently reported<sup>18</sup>. Briefly, we used *in vitro* transcription and translation to generate the primary RXFP1 peptide identified by PhIP-Seq with the addition of a HiBiT tag, which when complexed with the LgBiT protein, generates luminescence (Progeima system). Immunoprecipitation of tagged peptides was performed with a subset of AIH patients (in which larger volumes of serum or plasma were available), as well as with various controls. An antibody targeting the HiBiT protein tag (Progega) was used as a positive control in SLBA, and negative controls were performed with buffer in the absence of patient serum. A sample was considered positive if the signal in the assay exceeded a cutoff value of the mean plus 3 standard deviations from the mean of all control signal (Fig 3a). This assay demonstrated that the same 9 patients positive by PhIP-Seq were positive by SLBA, and none of the liver disease controls or healthy controls were positive (Fig 3a). We included an additional control of another fibrotic autoimmune disease, systemic sclerosis (SSc), as relaxin-2 knockout mice develop systemic fibrosis similar to human SSc and relaxin-based therapy has been pursued in clinical trials of SSc as a therapeutic. We found evidence of only 1 positive SSc patient for anti-RXFP1 reactivity among the 30 patients assayed (Fig 3, green), further underscoring the specificity of anti-RXFP1 antibodies to AIH. Following this validation experiment, we returned to the PhIP-Seq data to further assess correlation among all patients reacting with RXFP1, and found that all of the 9 positive patients (Z-score of > 2.5) had some evidence disease activity (defined by AST or ALT greater than 2x the upper limit of normal OR an elevated IgG level), and 8/9 patients (88%) had evidence of advanced fibrosis, F3 or greater. Lastly, we searched for predicted MHC Class II binding using IEDB<sup>32</sup>, which showed that more than half of the top MHC Class II alleles predicted to bind the RXFP1 peptide of interest corresponded to HLA alleles DRB1 03\*01 and 04\*01. Interestingly, GWAS studies have associated these two variants with AIH susceptibility among patients from Europe and North America<sup>7</sup> (Sup Table 2), suggesting a plausible mechanism for T cell binding.

## **Serum from AIH patients with anti-RXFP1 activity inhibits relaxin-2 signaling through RXFP1 in an IgG-dependent manner**

The functional implications of RXFP1 positivity were explored further to investigate the possibility that this autoantibody is pathogenic in AIH. The proposed structure of RXFP1 is diagrammed in Fig 4a using UCSF ChimeraX<sup>33</sup>, with annotation of various domains. The extracellular portion of RXFP1 (light gray, Fig 4a) is composed primarily of a large, leucine-rich repeat (LRR) motif, present among a larger family of LRR containing G protein-coupled receptors (LGRs)<sup>34</sup>. This LRR repeat region is the site of relaxin-2 ligand binding. Further highlighted in red is the RXFP1 peptide target of antibodies in patient serum, as identified in PhIP-Seq and SLBA assays. At the core of this peptide is an LRRNT motif, an N-terminal capping region required to maintain stability of the leucine-rich repeat (LRR) region; the RXFP1 peptide is also at the end of a linker region connecting the LRRNT to a low-density lipoprotein domain (LDLa domain; diagrammed in red, Fig 4a inset panel). This linker has been demonstrated to be required for RXFP1 receptor activation<sup>35</sup>. Based on the peptide's position within RXFP1, we hypothesized that antibodies targeting this epitope would be able to functionally interfere with RXFP1 signaling. We tested this hypothesis using the cAMP-Glo signaling assay (Promega) in which ligand binding to its cognate G protein-coupled receptor (GPCR) leads to the production of cAMP, which can be measured by luminescence as a sensitive read-out of ligand binding to the GPCR. We performed this assay in THP-1 cells, a human monocytic cell line, as cAMP production in response to relaxin-2 binding of RXFP1 has been well characterized in this system<sup>36</sup>. To test the impact of sera from anti-RXFP1-positive or -negative patients, we pre-incubated THP-1 cells for 2 hours and were able to demonstrate that pre-incubation with patient serum positive for anti-RXFP1 led to a shift in the RXFP1 dose-response curve (representative patients, Fig 4b), resulting in a significant increase in the half-maximal concentration of relaxin-2 required to generate a cAMP response, known as the EC50 (Fig 4c). AG-bead based depletion of IgG prior to pre-incubation with anti-RXFP1 positive serum abrogated this effect (Fig 4d), demonstrating that IgG from RXFP1 positive serum is capable of inhibiting relaxin-2 signaling.

### **Discussion:**

PhIP-Seq is a powerful approach for the discovery of novel autoantigens. This methodology has been applied by our group and others<sup>13-19,21</sup> to identify novel antibody targets that have informed the pathogenesis of several human diseases. Here, we used PhIP-Seq to investigate the role antibodies play in the pathogenesis of AIH, by leveraging a large cohort of patients from an international, multi-center collaboration. One unique aspect of this cohort is the inclusion of a large number of non-AIH liver disease controls including 178 patients with NAFLD. NAFLD is a disease that can coexist with AIH, and can be difficult to differentiate from AIH on the basis of serology given the high rates of co-occurring autoantibodies, such as ANA and anti-smooth muscle antibodies, reported to be positive in 20-30% of NAFLD patients<sup>4,37</sup>. Thus, these controls facilitated identifying targets that are specific to AIH. Furthermore, the application of PhIP-Seq allows for unbiased, high-throughput, and sensitive detection of putative autoantibodies.

The use of machine learning methods enabled us to predict which patients had AIH (relative to healthy controls); this predictive power relied on building a model based on all PhIP-Seq peptides assayed. This observation supports findings from a recent report demonstrating that detection of poly-reactive IgG was a more specific marker of AIH diagnosis than conventional autoantibody profiles<sup>38</sup>, emphasizing the broad array of serologic reactivity characteristically seen in AIH.

To further leverage the value of PhIP-Seq performed on patients from a multi-center international cohort of AIH patients and controls, we focused on the identification of disease- and tissue-specific antibodies, with the goal of trying to identify new insights into AIH pathogenesis. SLA was identified as the most specific target using this approach, providing strong proof of concept for the reliability of this assay. We further identified several novel autoantigens, such as IgG targeting RXFP1, and showed that serum from anti-RXFP1 positive patients inhibits relaxin-2 signaling via RXFP1. This inhibition has the potential to diminish the anti-fibrotic properties of relaxin-2. Future directions include evaluating whether identification of anti-RXFP1 in patient serum may enable risk stratification of AIH patients for fibrosis progression and has the potential to lead to the development of novel strategies for disease intervention.

We were also able to identify a possible role of non-liver specific of antibody reactivities, such as antibodies targeting a 19-amino acid epitope of DIP2A, which shares significant sequence homology with an 9-amino acid region of the HHV-6B protein U27. HHV6 has previously been implicated as a possible trigger of AIH-related molecular mimicry however, attempts to validate cross-reactivity of patients with anti-SLA antibody to HHV-6 U14 protein were unsuccessful<sup>29</sup>. Further study is required to determine whether DIP2A-positive patients react with the HHV-6 U27 protein based on the high degree of homology between the DIP2A epitope and HHV-6B.

This study has several limitations, including the small number of patients sharing any one particular set of reactivities. While this is in line with the proposed biology of AIH, it limits generalizability of our findings to larger populations. While the findings call attention to possible molecular mimicry, anti-viral antibody reactivities among patients were not measured. Finally, we understand the value of multiple different analytical approaches, and in that vein, remain committed to sharing the data generated using this approach with other groups having expertise in data analysis to re-evaluate our PhIP-Seq results for candidate hits. To facilitate this, full PhIP-seq data will be linked to the ultimate publication and available for download at Dryad.

## Methods

### Patient cohorts

As part of a multicenter, international collaboration, specimens of serum or plasma from patients with AIH (n = 115), NALFD (n = 178), or PBC (n = 26) were contributed by three well-characterized patient cohorts: Prospective Observational Study to Understand Liver Diseases (POSULD, San Francisco General Hospital, UCSF Health, Kaiser, SF, CA, USA), FrAILT (UCSF Parnassus Hospital, SF, CA, UCSA), and the Eppendorf University cohort (Hamburg, Germany). All patients provided informed consent in accord with institutional policies. Clinical data was obtained from existing databases and the medical record, including demographic information and disease activity, fibrosis stage, and medication regimen near the time of specimen collection. Patients with more than one diagnosis (eg overlap syndromes, AIH and NAFLD, etc.) were excluded from the current analysis. Coded specimens were analyzed in a deidentified fashion. Healthy control samples were obtained as de-identified samples from two sources: the first was from the New York Blood Center, as part of retention tubes collected at the time of blood donation from volunteer donors who provided their informed consent for their samples to be used for research. The second source was patient plasma from donors obtained from FDA-licensed blood collection facilities, purchased through SeraCare (K2EDTA human plasma).

## Phage immunoprecipitation sequencing (PhIP-Seq)

PhIP-seq was performed as previously reported<sup>14,15,39</sup> and PhIP-seq protocols described in detail are available at [protocols.io](https://www.protocols.io), located at the links below.

- Multichannel-based scaled: <https://www.protocols.io/view/scaled-moderate-throughput-multichannel-hip-proto-8epv5zpb6dv1b/v1>
- Library Preparation: <https://www.protocols.io/view/phage-display-library-prep-method-rm7vz3945gx1/v1>

Briefly, blood from individuals with Type 1 AIH and controls were analyzed using PhIP-Seq. Phage were cloned to express >700,000 overlapping peptides spanning the human proteome. The following text adapted from Zamecnik *et al*<sup>19</sup>: 96-well, 2mL deep well polypropylene plates were incubated with a blocking buffer (3% BSA in TBST) overnight at 4°C to prevent nonspecific binding. Blocking buffer was then replaced with 500 µL of freshly grown phage library and 1 µL of human sera 1:1 storage buffer (PBS with 0.04% NaN<sub>3</sub>, 40% Glycerol, 40mM HEPES). To facilitate antibody-phage binding, the deep well plates with library and sample were incubated overnight at 4°C on a rocker platform. 10 µL of each of Pierce Protein A and G Beads (ThermoFisher Scientific, 10002D & 10004D) slurry were aliquoted per reaction and washed 3 times in TNP-40 (140mM NaCl, 10mM Tris-HCL, 0.1% NP40). After the final wash, beads were resuspended in TNP-40 in half the slurry volume (20uL) and added to the phage-patient antibody mixture and incubated on the rocker at 4°C for 1 hour. Beads were then washed in RIPA buffer, and then the immunoprecipitated solution was resuspended in 150 µL of LB-Carb and then added to 0.5mL of log-phase BL5403 E. coli for amplification (OD600 = 0.4-0.6) until lysis was complete (approximately 2h) on an 800 rpm shaker. After amplification, sterile 5M NaCl was added to lysed E. coli to a final concentration of 0.5M NaCl to ensure complete lysis. The lysed solution was spun at 3220 rcf for 20 minutes and the top 500 µL was filtered to remove remaining cell debris. Filtered solution was transferred to a new pre-blocked deep-well plate where patient sera was added and subjected to another round of immunoprecipitation and amplification, and 3 total rounds of immunoprecipitation were completed. The final lysate was spun at 3220 rcf for 30 minutes, with supernatant then filtered and stored at 4°C for subsequent NGS library prep. Phage DNA from each sample was barcoded and amplified (Phusion PCR) and then underwent Next-Generation Sequencing on an Illumina NovaSeq Instrument (Illumina, San Diego, CA).

## Split Luciferase Binding Assay (SLBA)

This assay was performed as recently reported<sup>18</sup>; and a detailed SLBA protocol is available on [protocols.io](https://www.protocols.io) at [dx.doi.org/10.17504/protocols.io.4r3l27b9pg1y/v1](https://doi.org/10.17504/protocols.io.4r3l27b9pg1y/v1).

Briefly, the target peptide of relaxin family peptide was identified by PhIP-Seq, with the following peptide sequence: VGSVPVQCLCQGLELDCDETNLRAVPSVSSNVTAMSLQWNLIRKLPPDC. The following text was adapted from Rackaityte *et al*<sup>18</sup>: The nucleic acid sequence of this construct was inserted into a split luciferase construct containing a terminal HiBiT tag and synthesized (IDT) as DNA oligomers. Constructs were amplified by PCR using 5'-AAGCAGAGCTCGTTTAGTGAACCGTCAGA-3' and 5'-GGCCGGCCGTTTAAACGCTGATCTT-3' primer pair. Unpurified PCR product was used as input to rabbit reticulocyte transcription translation system (Promega) and Nano-Glo HiBit Lytic Detection System (Promega Cat No. N3040) was used to measure relative luciferase units (RLU) of translated peptides in a

luminometer. Peptides were normalized to 5e6 RLU input, incubated overnight with patient sera, and immunoprecipitated with protein A and protein G sepharose beads (Millipore Sigma). After thoroughly washing beads with SLBA buffer (0.15M NaCl, 0.02M Tris-HCl pH7.4, 1% w/v sodium azide, 1% w/v bovine serum albumin, and 0.15% v/v Tween-20), luminescence remaining on beads was measured using Nano-Glo HiBit Lytic Detection System (Promega Cat No. N3040) in a luminometer. Anti-HiBiT antibody (Promega) was used as a positive control for each peptide. An patient was considered positive by SLBA if the RLU exceeded the mean of all controls + 3 standard deviations.

### Relaxin-2 signaling/cAMP-Glo assay/IgG depletion

Recombinant human relaxin H2 was purchased from R&D systems (catalog # 6586-RN-025/CF) and resuspended in 1x sterile PBS with 1% BSA at a concentration of 100 ul/ml. In order to block cyclic nucleotide phosphodiesterases during the cAMP-Glo assay, serial dilutions of relaxin were made up in induction buffer composed of 1x PBS with 500  $\mu$ M 3-isobutyl-1-methylxanthine (IBMX, Sigma Aldrich), and 500  $\mu$ M Ro 20-1724 (Cayman Chemical). Relaxin concentrations ranged from 0.0488 – 50 ng/ul of ligand, and the 12<sup>th</sup> dilution was “untreated” control, of just induction buffer. Dilutions were made in sterile 96 well plates in order to apply to THP1 cells to study signaling. THP1 cells were obtained via ATCC, and seeded at a density of  $1 \times 10^6$  cells/well of a 96-well plate. Prior to the addition of relaxin-2, THP1 cells were pre-incubated with patient serum from RXFP1 positive patients or RXPF1 negative patients at a dilution of [1:100] in RPMI with 10% FBS/1% PSG for 2 hours in a 37 °C incubator. Following this pre-incubation, relaxin was added at each of the 11 pre-diluted concentrations to pre-incubated THP-1 cells, and 96-well plates were returned to the 37 °C incubator for two hours. All reactions were performed in triplicate. Following this incubation, cells were assayed for cAMP production using the cAMP-Glo assay (Promega catalog # V1502) was performed per the manufacturer’s instructions, with the following modifications. Lysis of cells was performed using 20 ul of cAMP-Glo lysis buffer for 30 minutes in standard tissue culture plates, and then transferred to opaque white 96-well plates (Nunc) for the remainder of the assay in order to facilitate plate reading of relative light units (RLU) in a luminometer (Promega). The remainder was as per manufacturer’s instructions. Results were then normalized to the fraction of untreated RLU, and EC50 values were calculated using GraphPad Prism software. For depletion experiemnts, prior to cAMP-Glo assay, as described above, sera was pre-incubated for 2 hours at room temperature with Pierce Protein A and G Beads (Pierce) at a ratio of 20 ul of A/20 ul G to 1 ul of serum, with gentle rocking. Samples were ultimately pre-incubated with THP1 cells at a dilution of [1:250] prior to addition of relaxin-2.

### Bioinformatic and statistical analysis

Raw sequencing reads were aligned to the input peptide library using Bowtie2, and aligned at the protein level using RAPsearch, as previously described<sup>15</sup>. Aligned reads were controlled for varying read depth by aligning to 100,000 reads per K-mer (RPK). Fold-change for each peptide was generated from the mean RPK of the controls, and a z-score was calculated from the background distribution. An autoantigen was considered a hit if enrichment was >2.5 standard deviations from the mean of healthy controls and present in at least 7 AIH patients (6% sensitivity) and not present in more than 2% of control patients (98% specificity). Logistic regression was performed using the Scikit-learn package in Python<sup>40</sup>, using the liblinear solver and L1 regularization. The model was evaluated with and 85-15 train-test-split ratio, and performed with 100 iterations, plotting the data corresponding to the max, min, and median AUC.



Annotation of protein sequences was performed using the proteINSIDE analysis platform (<https://www.proteinside.org>) for tissue level annotation<sup>23</sup>.

Molecular graphics and analyses performed with UCSF ChimeraX (<https://www.cgl.ucsf.edu/chimerax/>), developed by the Resource for Biocomputing, Visualization, and Informatics at the University of California, San Francisco, with support from National Institutes of Health R01-GM129325 and the Office of Cyber Infrastructure and Computational Biology, National Institute of Allergy and Infectious Diseases.

HLA Class II binding predictions were performed using the Immune Epitope Database (IEDB, [www.iedb.org](http://www.iedb.org))<sup>41</sup>.

## **Funding and Acknowledgements**

NIH/NIDDK T32DK060414, NIH/NIDDK 1R21DK127275-01, NIH/NIDDK P30DK026743 (UCSF Liver Center), Chan Zuckerberg Biohub, AASLD Autoimmune Liver Diseases Pilot Research Award, UCSF Liver Center P30DK026743 Pilot & Feasibility Award, UCSF Department of Medicine Cohort Development Grant, UCSF Precision Medicine in Rheumatology Grant, D. Montgomery Bissell, Emily D. Crawford, Michael Wilson

## References

1. Lamba M, Ngu JH, Stedman CAM. Trends in Incidence of Autoimmune Liver Diseases and Increasing Incidence of Autoimmune Hepatitis. *Clinical Gastroenterology and Hepatology*. Elsevier; 2021 Mar 1;19(3):573-579.e1. PMID: 32526342
2. Lee B, Holt EW, Wong RJ, Sewell JL, Somsouk M, Khalili M, Maher JJ, Tana MM. Race/ethnicity is an independent risk factor for autoimmune hepatitis among the San Francisco underserved. *Autoimmunity*. 2018 Aug;51(5):258–264. PMID: PMC6311708
3. Wen JW, Kohn MA, Wong R, Somsouk M, Khalili M, Maher J, Tana MM. Hospitalizations for Autoimmune Hepatitis Disproportionately Affect Black and Latino Americans. *Am J Gastroenterol*. 2018 Feb;113(2):243–253. PMID: PMC6522224
4. Kanzler S, Weidemann C, Gerken G, Löhr HF, Galle PR, Büschenfelde KHM zum, Lohse AW. Clinical significance of autoantibodies to soluble liver antigen in autoimmune hepatitis. *Journal of Hepatology*. 1999 Oct 1;31(4):635–640.
5. Manns M, Kyriatsoulis A, Gerken G, Staritz M, Meyer KH, Büschenfelde Z. CHARACTERISATION OF A NEW SUBGROUP OF AUTOIMMUNE CHRONIC ACTIVE HEPATITIS BY AUTOANTIBODIES AGAINST A SOLUBLE LIVER ANTIGEN. *The Lancet*. 1987 Feb 7;329(8528):292–294.
6. Wies I, Brunner S, Henninger J, Herkel J, Kanzler S, zum Büschenfelde KHM, Lohse AW. Identification of target antigen for SLA/LP autoantibodies in autoimmune hepatitis. *The Lancet*. 2000 Apr 29;355(9214):1510–1515.
7. de Boer YS, van Gerven NMF, Zwijs A, Verwer BJ, van Hoek B, van Erpecum KJ, Beuers U, van Buuren HR, Drenth JPH, den Ouden JW, Verdonk RC, Koek GH, Brouwer JT, Guichelaar MMJ, Vrolijk JM, Kraal G, Mulder CJJ, van Nieuwkerk CMJ, Fischer J, Berg T, Stickel F, Sarrazin C, Schramm C, Lohse AW, Weiler-Normann C, Lerch MM, Nauck M, Völzke H, Homuth G, Bloemena E, Verspaget HW, Kumar V, Zhernakova A, Wijmenga C, Franke L, Bouma G, Dutch Autoimmune Hepatitis Study Group, LifeLines Cohort Study, Study of Health in Pomerania. Genome-wide association study identifies variants associated with autoimmune hepatitis type 1. *Gastroenterology*. 2014 Aug;147(2):443-452.e5. PMID: 24768677
8. Longhi MS, Ma Y, Bogdanos DP, Cheeseman P, Mieli-Vergani G, Vergani D. Impairment of CD4(+)CD25(+) regulatory T-cells in autoimmune liver disease. *J Hepatol*. 2004 Jul;41(1):31–37. PMID: 15246204
9. Ferri S, Longhi MS, De Molo C, Lalanne C, Muratori P, Granito A, Hussain MJ, Ma Y, Lenzi M, Mieli-Vergani G, Bianchi FB, Vergani D, Muratori L. A multifaceted imbalance of T cells with regulatory function characterizes type 1 autoimmune hepatitis. *Hepatology*. 2010 Sep;52(3):999–1007. PMID: 20683931
10. Zachou K, Arvaniti P, Lyberopoulou A, Dalekos GN. Impact of genetic and environmental factors on autoimmune hepatitis. *J Transl Autoimmun*. 2021 Sep 21;4:100125. PMID: PMC8479787

11. Manns MP, Lohse AW, Vergani D. Autoimmune hepatitis – Update 2015. *Journal of Hepatology*. Elsevier; 2015 Apr 1;62(1):S100–S111. PMID: 25920079
12. Autoimmune hepatitis: From current knowledge and clinical practice to future research agenda - Sebode - 2018 - *Liver International* - Wiley Online Library [Internet]. [cited 2023 Jun 11]. Available from: <https://onlinelibrary.wiley.com/doi/10.1111/liv.13458>
13. Larman HB, Zhao Z, Laserson U, Li MZ, Ciccio A, Gakidis MAM, Church GM, Kesari S, Leproust EM, Solimini NL, Elledge SJ. Autoantigen discovery with a synthetic human peptidome. *Nat Biotechnol*. 2011 May 22;29(6):535–541. PMID: PMC4169279
14. Vazquez SE, Mann SA, Bodansky A, Kung AF, Quandt Z, Ferré EM, Landegren N, Eriksson D, Bastard P, Zhang SY, Liu J, Mitchell A, Proekt I, Yu D, Mandel-Brehm C, Wang CY, Miao B, Sowa G, Zorn K, Chan AY, Tagi VM, Shimizu C, Tremoulet A, Lynch K, Wilson MR, Kämpe O, Dobbs K, Delmonte OM, Bacchetta R, Notarangelo LD, Burns JC, Casanova JL, Lionakis MS, Torgerson TR, Anderson MS, DeRisi JL. Autoantibody discovery across monogenic, acquired, and COVID-19-associated autoimmunity with scalable PhIP-seq. Rosen A, Rath S, Pillai S, editors. *eLife*. eLife Sciences Publications, Ltd; 2022 Oct 27;11:e78550.
15. Vazquez SE, Ferré EM, Scheel DW, Sunshine S, Miao B, Mandel-Brehm C, Quandt Z, Chan AY, Cheng M, German M, Lionakis M, DeRisi JL, Anderson MS. Identification of novel, clinically correlated autoantigens in the monogenic autoimmune syndrome APS1 by proteome-wide PhIP-Seq. Rosen A, Rath S, Craft J, editors. *eLife*. eLife Sciences Publications, Ltd; 2020 May 15;9:e55053.
16. Kelch-like Protein 11 Antibodies in Seminoma-Associated Paraneoplastic Encephalitis | *NEJM* [Internet]. [cited 2023 Jun 6]. Available from: <https://www.nejm.org/doi/10.1056/NEJMoa1816721>
17. O'Donovan B, Mandel-Brehm C, Vazquez SE, Liu J, Parent AV, Anderson MS, Kassimatis T, Zekeridou A, Hauser SL, Pittock SJ, Chow E, Wilson MR, DeRisi JL. High-resolution epitope mapping of anti-Hu and anti-Yo autoimmunity by programmable phage display. *Brain Commun*. 2020 Aug 3;2(2):fcaa059. PMID: PMC7425417
18. Rackaityte E, Proekt I, Miller HS, Ramesh A, Brooks JF, Kung AF, Mandel-Brehm C, Yu D, Zamecnik C, Bair R, Vazquez SE, Sunshine S, Abram CL, Lowell CA, Rizzuto G, Wilson MR, Zikherman J, Anderson MS, DeRisi JL. Validation of a murine proteome-wide phage display library for the identification of autoantibody specificities [Internet]. *bioRxiv*; 2023 [cited 2023 Jun 10]. p. 2023.04.07.535899. Available from: <https://www.biorxiv.org/content/10.1101/2023.04.07.535899v1>
19. Zamecnik CR, Sowa GM, Abdelhak A, Dandekar R, Bair RD, Wade KJ, Bartley CM, Tubati A, Gomez R, Fouassier C, Gerungan C, Alexander J, Wapniarski AE, Loudermilk RP, Eggers EL, Zorn KC, Ananth K, Jabassini N, Mann SA, Ragan NR, Santaniello A, Henry RG, Baranzini SE, Zamvil SS, Bove RM, Guo CY, Gelfand JM, Cuneo R, Büdingen HC von, Oksenberg JR, Cree BA, Hollenbach JA, Green AJ, Hauser SL, Wallin MT, DeRisi JL, Wilson MR. A Predictive Autoantibody Signature in Multiple Sclerosis [Internet]. *medRxiv*; 2023 [cited 2023 Jun 11]. p. 2023.05.01.23288943. Available from: <https://www.medrxiv.org/content/10.1101/2023.05.01.23288943v1>

20. Bodansky A, Sabatino JJ, Vazquez SE, Chou J, Novak T, Moffitt KL, Miller HS, Kung AF, Rackaityte E, Zamecnik CR, Rajan JV, Kortbawi H, Mandel-Brehm C, Mitchell A, Wang CY, Saxena A, Zorn K, Yu DJL, Asaki J, Pluvinage JV, Wilson MR, Loftis LL, Hobbs CV, Tarquinio KM, Kong M, Fitzgerald JC, Espinal PS, Walker TC, Schwartz SP, Crandall H, Irby K, Staat MA, Rowan CM, Schuster JE, Halasa NB, Gertz SJ, Mack EH, Maddux AB, Cvijanovich NZ, Zinter MS, Zambrano LD, Campbell AP, Randolph AG, Anderson MS, DeRisi JL, Investigators the OC 19 NSG. A distinct cross-reactive autoimmune response in multisystem inflammatory syndrome in children (MIS-C) [Internet]. medRxiv; 2023 [cited 2023 Jun 26]. p. 2023.05.26.23290373. Available from: <https://www.medrxiv.org/content/10.1101/2023.05.26.23290373v1>
21. ZSCAN1 Autoantibodies Are Associated with Pediatric Paraneoplastic ROHHAD - Mandel-Brehm - 2022 - Annals of Neurology - Wiley Online Library [Internet]. [cited 2023 Jun 26]. Available from: <https://onlinelibrary.wiley.com/doi/full/10.1002/ana.26380>
22. Lohse AW, Hennes E. Diagnostic criteria for autoimmune hepatitis. *Hepatol Res.* 2007 Oct;37 Suppl 3:S509. PMID: 17931212
23. Kaspric N, Reichstadt M, Picard B, Tournayre J, Bonnet M. Protein Function Easily Investigated by Genomics Data Mining Using the ProtelNSIDE Online Tool. *Genomics Comput Biol.* 2015 Sep 18;1(1):16.
24. Lee BH, Kwak SH, Shin JI, Lee SH, Choi HJ, Kang HG, Ha IS, Lee JS, Dragon-Durey MA, Choi Y, Cheong HI. Atypical hemolytic uremic syndrome associated with complement factor H autoantibodies and CFHR1/CFHR3 deficiency. *Pediatr Res.* 2009 Sep;66(3):336–340. PMID: 19531976
25. Zhang Y, Lin J, Wei F. The Function and Roles of ADAMTS-7 in Inflammatory Diseases. *Mediators Inflamm.* 2015;2015:801546. PMCID: PMC4677222
26. Pi L, Jorgensen M, Oh SH, Protopapadakis Y, Gjymishka A, Brown A, Robinson P, Liu C, Scott EW, Schultz GS, Petersen BE. A Disintegrin and Metalloprotease with Thrombospondin Type I Motif 7: A New Protease for Connective Tissue Growth Factor in Hepatic Progenitor/Oval Cell Niche. *The American Journal of Pathology.* 2015 Jun 1;185(6):1552–1563.
27. Iredale JP, Pellicoro A, Fallowfield JA. Liver Fibrosis: Understanding the Dynamics of Bidirectional Wound Repair to Inform the Design of Markers and Therapies. *Digestive Diseases.* 2017 May 3;35(4):310–313.
28. Snowdon VK, Lachlan NJ, Hoy AM, Hadoke PWF, Semple SI, Patel D, Mungall W, Kendall TJ, Thomson A, Lennen RJ, Jansen MA, Moran CM, Pellicoro A, Ramachandran P, Shaw I, Aucott RL, Severin T, Saini R, Pak J, Yates D, Dongre N, Duffield JS, Webb DJ, Iredale JP, Hayes PC, Fallowfield JA. Serelaxin as a potential treatment for renal dysfunction in cirrhosis: Preclinical evaluation and results of a randomized phase 2 trial. *PLoS Med.* 2017 Feb;14(2):e1002248. PMCID: PMC5330452
29. Herkel J, Heidrich B, Nieraad N, Wies I, Rother M, Lohse AW. Fine specificity of autoantibodies to soluble liver antigen and liver/pancreas. *Hepatology.* 2002;35(2):403–408.

30. HHV-6 in liver transplantation: A literature review - Phan - 2018 - Liver International - Wiley Online Library [Internet]. [cited 2023 Jun 11]. Available from: <https://onlinelibrary.wiley.com/doi/10.1111/liv.13506>
31. Schmitt K, Deutsch J, Tulzer G, Meindl R, Aberle S. Autoimmune hepatitis and adrenal insufficiency in an infant with human herpesvirus-6 infection. *The Lancet*. Elsevier; 1996 Oct 5;348(9032):966. PMID: 8843841
32. Reynisson B, Alvarez B, Paul S, Peters B, Nielsen M. NetMHCpan-4.1 and NetMHCIIpan-4.0: improved predictions of MHC antigen presentation by concurrent motif deconvolution and integration of MS MHC eluted ligand data. *Nucleic Acids Res*. 2020 Jul 2;48(W1):W449–W454. PMCID: PMC7319546
33. Pettersen EF, Goddard TD, Huang CC, Meng EC, Couch GS, Croll TI, Morris JH, Ferrin TE. UCSF ChimeraX: Structure visualization for researchers, educators, and developers. *Protein Sci*. 2021 Jan;30(1):70–82. PMCID: PMC7737788
34. Petrie EJ, Lagaida S, Sethi A, Bathgate RAD, Gooley PR. In a Class of Their Own – RXFP1 and RXFP2 are Unique Members of the LGR Family. *Frontiers in Endocrinology* [Internet]. 2015 [cited 2023 Jun 11];6. Available from: <https://www.frontiersin.org/articles/10.3389/fendo.2015.00137>
35. Sethi A, Bruell S, Ryan T, Yan F, Tanipour MH, Mok YF, Draper-Joyce C, Khandokar Y, Metcalfe RD, Griffin MDW, Scott DJ, Hossain MA, Petrie EJ, Bathgate RAD, Gooley PR. Structural Insights into the Unique Modes of Relaxin-Binding and Tethered-Agonist Mediated Activation of RXFP1 and RXFP2. *J Mol Biol*. 2021 Oct 15;433(21):167217. PMID: 34454945
36. Parsell DA, Mak JY, Amento EP, Unemori EN. Relaxin Binds to and Elicits a Response from Cells of the Human Monocytic Cell Line, THP-1\*. *Journal of Biological Chemistry*. 1996 Nov 1;271(44):27936–27941.
37. Mitra A, Ray S. High-Titre ANA Positivity in NAFLD: An Uncommon Presentation of a Common Disease. *Eur J Case Rep Intern Med*. 2020 Jun 8;7(9):001714. PMCID: PMC7473677
38. Taubert R, Engel B, Diestelhorst J, Hupa-Breier KL, Behrendt P, Baerlecken NT, Sühs KW, Janik MK, Zachou K, Sebode M, Schramm C, Londoño MC, Habes S, Consortium the UA, Oo YH, Lalanne C, Pape S, Schubert M, Hust M, Dübel S, Thevis M, Jonigk D, Beindiek J, Buettner FFR, Drenth JPH, Muratori L, Adams DH, Dyson JK, Renand A, Graupera I, Lohse AW, Dalekos GN, Milkiewicz P, Stangel M, Maasoumy B, Witte T, Wedemeyer H, Manns MP, Jaeckel E. Quantification of polyreactive immunoglobulin G facilitates the diagnosis of autoimmune hepatitis. *Hepatology*. 2022;75(1):13–27.
39. Zamecnik CR, Rajan JV, Yamauchi KA, Mann SA, Loudermilk RP, Sowa GM, Zorn KC, Alvarenga BD, Gaebler C, Caskey M, Stone M, Norris PJ, Gu W, Chiu CY, Ng D, Byrnes JR, Zhou XX, Wells JA, Robbiani DF, Nussenzweig MC, DeRisi JL, Wilson MR. ReScan, a Multiplex Diagnostic Pipeline, Pans Human Sera for SARS-CoV-2 Antigens. *Cell Rep Med*. 2020 Sep 24;1(7):100123. PMCID: PMC7513813

40. Pedregosa F, Varoquaux G, Gramfort A, Michel V, Thirion B, Grisel O, Blondel M, Prettenhofer P, Weiss R, Dubourg V, Vanderplas J, Passos A, Cournapeau D. Scikit-learn: Machine Learning in Python. MACHINE LEARNING IN PYTHON.
41. Vita R, Mahajan S, Overton JA, Dhanda SK, Martini S, Cantrell JR, Wheeler DK, Sette A, Peters B. The Immune Epitope Database (IEDB): 2018 update. Nucleic Acids Res. 2019 Jan 8;47(Database issue):D339–D343. PMID: PMC6324067

## Figures

**Table 1. Patient Characteristics**

| Diagnosis       | n   | Mean Age | Female | Caucasian | Latinex |
|-----------------|-----|----------|--------|-----------|---------|
| AIH             | 115 | 58       | 70%    | 96%       | 14%     |
| NAFLD           | 178 | 60       | 60%    | 82%       | 67%     |
| PBC             | 26  | 58%      | 94%    | 84%       | 21%     |
| Healthy Control | 94  | --       | --     | --        | --      |

|              | F3/4 fibrosis | On steroids | ANA + | ASMA + | Mean ALT | Mean AST | Mean IgG |
|--------------|---------------|-------------|-------|--------|----------|----------|----------|
| AIH Patients | 60%           | 18%         | 88%   | 83%    | 79       | --       | 1520     |

**Figure 1. Phage immunoprecipitation sequencing enables AIH disease prediction by logistic regression.**

- (a) Phage display library design, and an overview of methods to apply PhIP-Seq to evaluate the autoimmune hepatitis and control cohort.
- (b) Summary of the customized bioinformatic analysis pipeline to applied to analyze next-generation sequencing output of PhIP-Seq data.
- (c) Receiver operating characteristic (ROC) curve analysis for prediction of AIH vs healthy control disease status, area under the curve (AUC).



## a Phage immunoprecipitation sequencing (PhIP-Seq), methods workflow

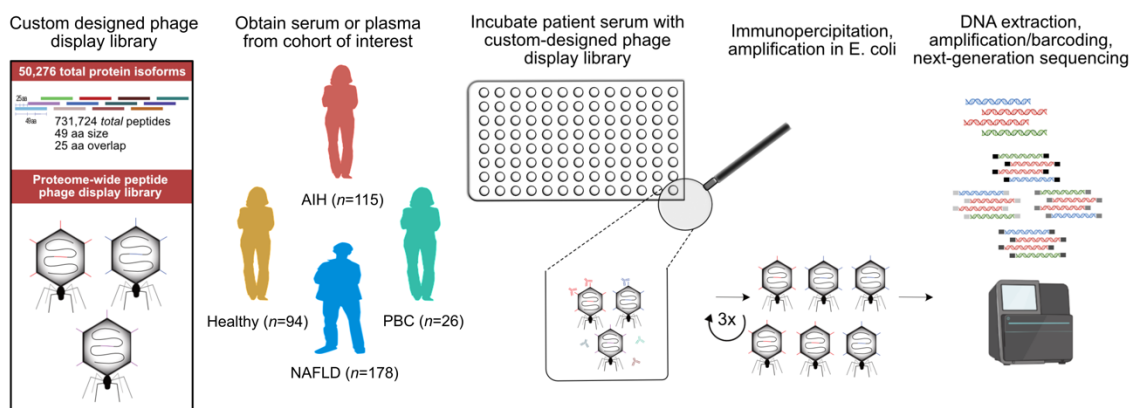

## b Bioinformatic Analysis Pipeline

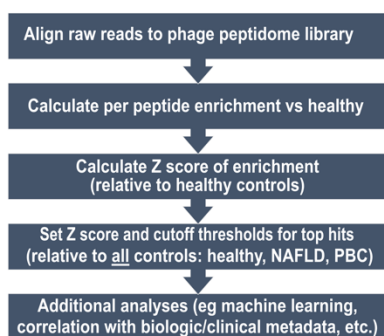

## c Logistic Regression: AIH v Healthy

85-15 train-test split, 100 iterations

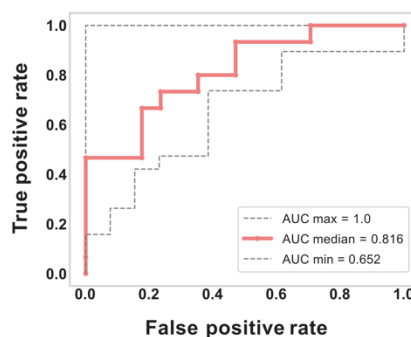

## Figure 2. PhIP-Seq identifies novel (and known) antigenic targets present in AIH, which are largely absent in control patients.

(a) Heatmap of liver-enriched or highly expressed genes, based on ProteinINSIDE annotations, which were identified as putative hits in AIH patients, shaded by Z-score of enrichment (legend, panel e).

(b) Heatmap of liver-enriched or highly expressed genes, based on ProteinINSIDE annotations, which were identified as putative hits in control patients; top legend indicates whether controls had NAFLD (blue), PBC (green), or were healthy controls (yellow), shaded by Z-score of enrichment (legend, panel e).

(c) Heatmap of the top 20 peptides identified as hits in PhIP-Seq, not noted to be expressed in liver based on ProteinINSIDE annotations, shaded by Z-score of enrichment (legend, panel e).

(d) Clustal Omega alignment of the identified DIP2A epitope with the U27 protein of HHV6.

(e) Legend of Z-score of enrichment

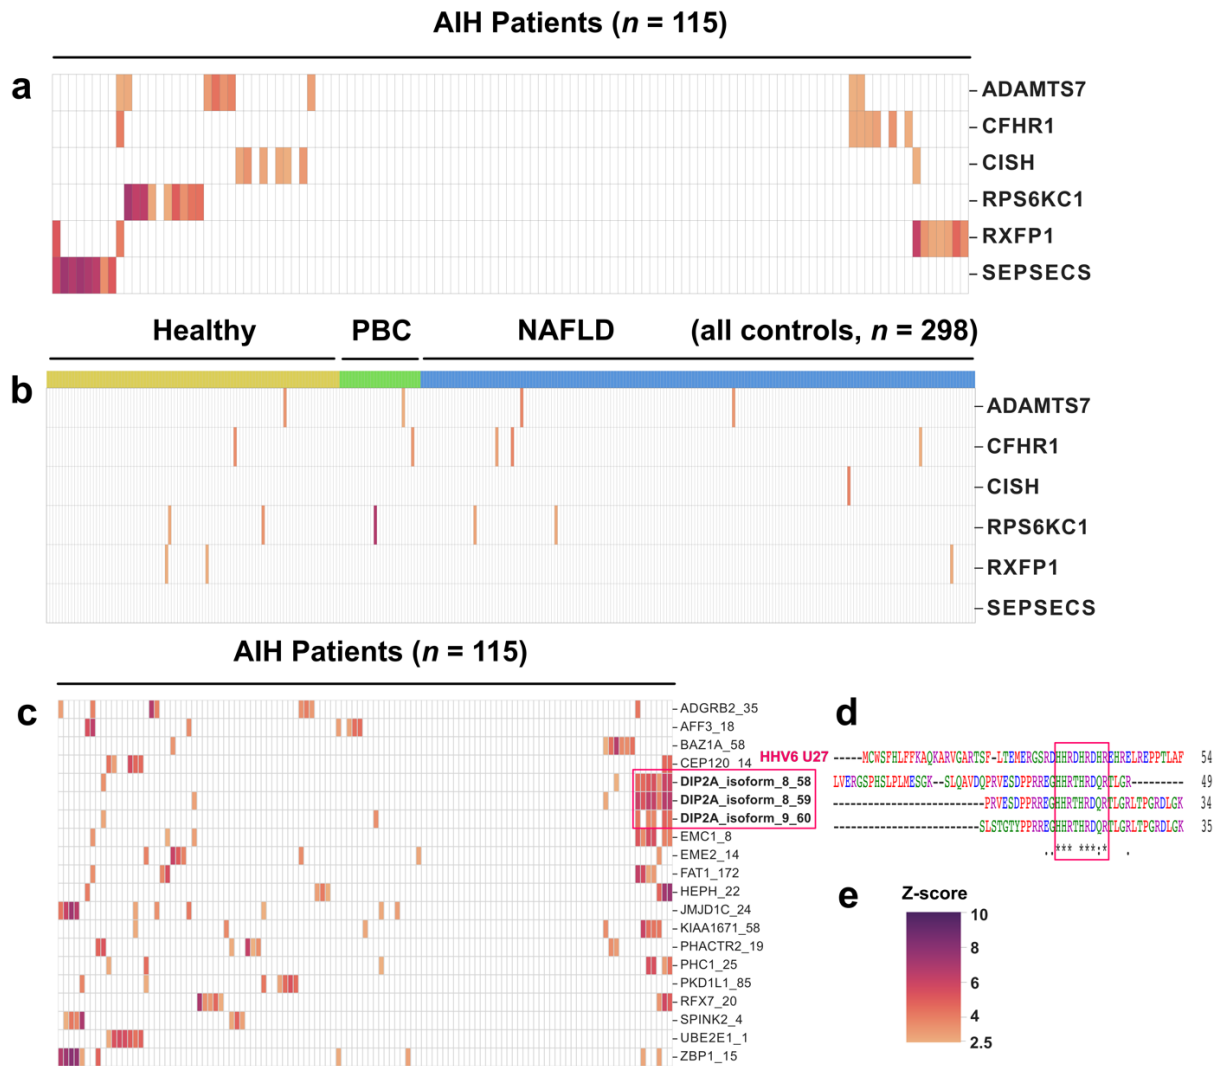

### Figure 3.

(a) SLBA validation of anti-RXFP1 peptide reactivity in various patients groups (x-axis), as measured by enrichment of relative light units (RLU, y-axis); the cutoff for positivity was set at the mean + 3 standard deviations of all controls (blue dashed line).

(b) PhIP-Seq data plotting z-score of anti-RXFP1 peptide reactivity among AIH patients (y-axis); AIH patients were separated into groups of active vs inactive AIH (x-axis); patients considered as positivity reactive against anti-RXFP1 had a Z-score of enrichment >2.5 (denoted by blue dashed line, highlighted in pink).

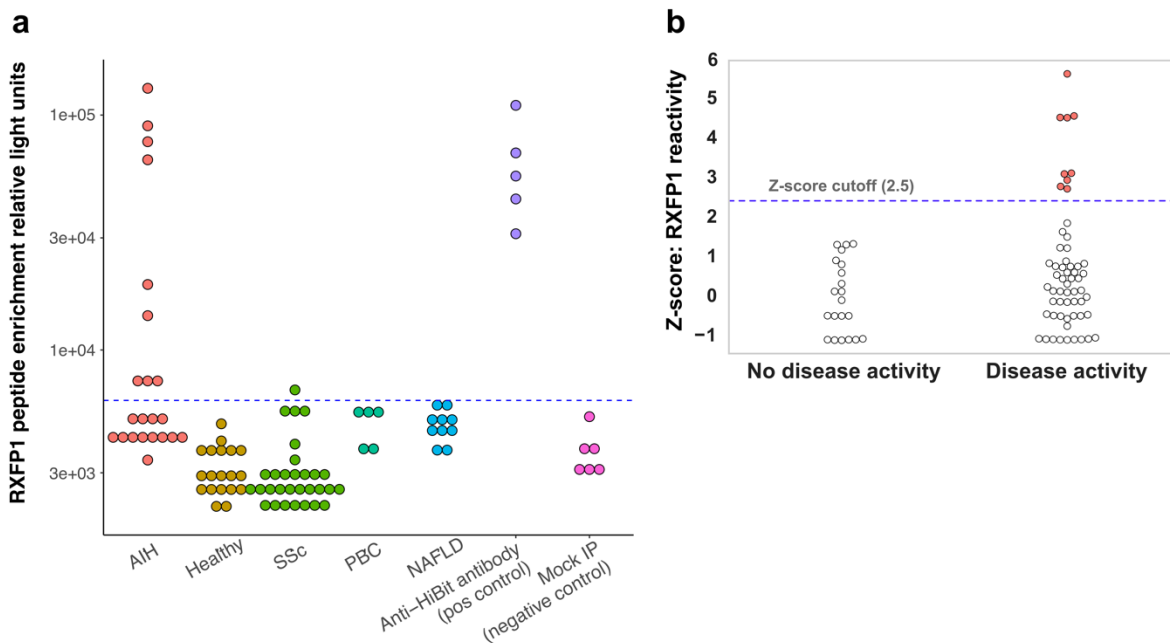

### Figure 4.

(a) Putative structure of RXFP1, as depicted using ChimeraX; the region corresponding to the RXFP1 peptide identified by PhIP-Seq is highlighted in red, along with annotation of functional domains (for schematic representation, see panel inset).

(b) Assay of relaxin-2-induced induction of cAMP by RXFP1, in TH1 cells pre-incubated with [1:100] dilution of patient serum negative (green) or positive (red) for RXFP1 antibodies; relaxin concentration (x-axis), cAMP response reported as a percent of untreated control signal, y-axis.

(c) Measurement of relaxin-2 EC50 in ng/ul (y-axis) for patient serum negative (green) or positive (red) for RXFP1 antibodies.

(d) Depletion of IgG using protein A-G beads (x-axis, right) or mock-depleted serum (x-axis, left) was performed prior to incubating THP1 cells with patient serum at [1:250]; resultant impact on relaxin-2 signal expressed as a percent of untreated signal (y-axis).

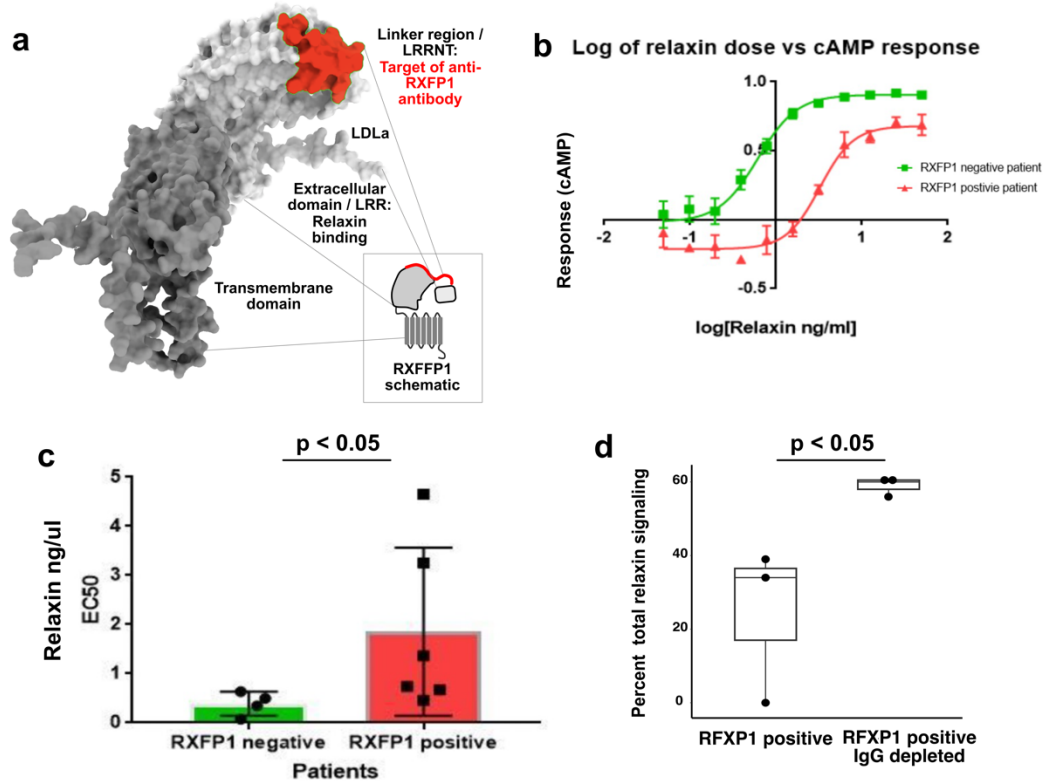

Source: https://medrxiv.org/content/10.1101/2023.06.12.23291297v2.full.pdf
